# Supplementary material
Source: Research Square preprint supplement (doi:10.21203/rs.3.rs-9144236/v1)
Supplement: Supplementary file 1 [file 0509c2c1cdbd46b79d9f558f.docx]

**Supplementary Materials**

| **Supplementary Table 1. Association Between Baseline Characteristics and Missingness of 3- and 6-Month Follow-Up Outcomes** | | | | |
| --- | --- | --- | --- | --- |
|  | 1–3 month | | 3–6 month | |
| Variable | OR (95%CI) | *p* | OR (95%CI) | *p* |
| (Intercept) | 13.74 (1.7-110.75) | **0.014** | 49.88 (9.02-275.75) | **＜0.001** |
| Age | 0.79 (0.73-0.87) | **＜0.001** | 0.78 (0.72-0.83) | **＜0.001** |
| Illness Duration | 0.64 (0.43-0.96) | **0.032** | 0.7 (0.5-0.97) | **0.035** |
| AIS | 1 (0.94-1.05) | 0.906 | 1 (0.95-1.04) | 0.938 |
| HAMD-a | 0.98 (0.91-1.05) | 0.515 | 1.04 (0.98-1.1) | 0.207 |
| HAMA-a | 1.04 (0.99-1.1) | 0.127 | 1 (0.95-1.04) | 0.875 |
| Gender (Reference: Male) |  |  |  |  |
| Female | 1.26 (0.67-2.38) | 0.468 | 1.12 (0.69-1.82) | 0.654 |
| Medication Use (Reference: Yes) |  |  |  |  |
| No | 0.78 (0.39-1.53) | 0.465 | 0.82 (0.48-1.43) | 0.490 |
| Episode Status (Reference: First Episode) |  |  |  |  |
| Recurrent episode | 2.81 (1.49-5.31) | **0.001** | 1.76 (1.05-2.93) | **0.031** |
| Lifetime Suicide Attempt (Reference: No) |  |  |  |  |
| 1-2 times | 1.09 (0.62-1.91) | 0.763 | 0.97 (0.61-1.55) | 0.913 |
| ≥3 times | 0.41 (0.17-0.97) | **0.044** | 0.44 (0.23-0.85) | **0.015** |
| Note. AIS: Athens Insomnia Scale; HAMD-a and HAMA-a denote adjusted totals with sleep-related items removed (HAMD items 4–6; HAMA item 4). Bold text is used to indicate statistically significant results. | | | | |

| **Supplementary Table 2. Cox models for 6-month risk of suicide attempt（Daytime Functioning and Nocturnal Symptoms）** | | |
| --- | --- | --- |
| Variable | HR (95% CI) | *p* |
| AIS-Nocturnal | 1.06 (0.99-1.13) | 0.11 |
| AIS-Daytime | 1.09 (0.94-1.25) | 0.251 |
| Age | 0.92 (0.84-1) | 0.064 |
| HAMD-a | 1.09 (1.02-1.17) | **0.019** |
| HAMA-a | 0.97 (0.91-1.03) | 0.282 |
| Medication Use (Reference: Yes) |  |  |
| No | 0.67 (0.31-1.44) | 0.311 |
| Episode Status (Reference: First Episode) |  |  |
| Recurrent episode | 1.14 (0.65-2.01) | 0.648 |
| Illness Duration (Reference: < 6 months) |  |  |
| 6 – 24 months | 0.49 (0.28-0.85) | **0.013** |
| > 24 months | 0.32 (0.14-0.75) | **0.021** |
| Gender (Reference: Male) |  |  |
| Female | 1.67 (0.85-3.28) | 0.14 |
| Suicide History (Reference: No) |  |  |
| Yes | 2.1 (1.21-3.67) | **0.015** |
| Note. Hazard ratios (HRs) with 95% confidence intervals (CIs) were estimated using Cox models. The primary analyses were based on multiple imputation (m = 5 datasets) to account for missing data, while complete case analyses were conducted as sensitivity analyses. P-values are derived from Wald tests. AIS: Athens Insomnia Scale; HAMD-a and HAMA-a denote adjusted totals with sleep-related items removed (HAMD items 4–6; HAMA item 4). Bold text is used to indicate statistically significant results. | | |


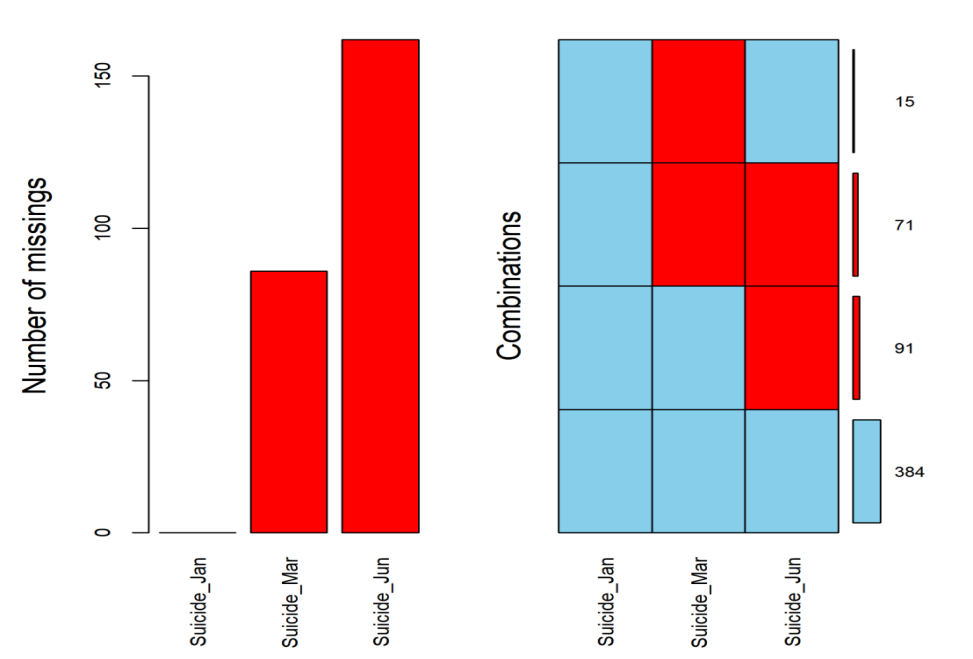


**Supplementary Fig 1.** Missing data patterns for suicide attempt assessments at 1-, 3-, and 6-month follow-ups. The plot shows the pattern of missing values for suicide attempt variables at each follow–up time point. Numbers above the bars indicate the count of observed values for each variable. The x-axis represents the three follow-up assessments, and the aggregation bars show combinations of missingness across these time points. This visualization was generated using the aggr() function from the VIM R package and informs the subsequent multiple imputation process.
